# Supplementary material
Source: PubMed Central journal article supplement (PMC4666087)
Supplement: ry142818suppt1.pdf [file ry142818suppt1.pdf]

**Table E1. Lesions by Median Reader Score, Grouped Pathologic Score, and Location in the Prostate**

| Sequence and Median Reader Score | PZ        |        | TZ        |        | PZ              |                               | TZ              |                               |
|----------------------------------|-----------|--------|-----------|--------|-----------------|-------------------------------|-----------------|-------------------------------|
|                                  | No Cancer | Cancer | No Cancer | Cancer | Low-risk Cancer | Clinically Significant Cancer | Low-risk Cancer | Clinically Significant Cancer |
| <b>T2 weighted</b>               |           |        |           |        |                 |                               |                 |                               |
| 2                                | 10        | 2      | 0         | 0      | 12              | 0                             | 12              | 0                             |
| 3                                | 30        | 6      | 10        | 3      | 35              | 1                             | 35              | 1                             |
| 4                                | 14        | 34     | 8         | 8      | 38              | 10                            | 38              | 10                            |
| 5                                | 2         | 26     | 0         | 9      | 8               | 20                            | 8               | 20                            |
| <b>DWI</b>                       |           |        |           |        |                 |                               |                 |                               |
| ≤3                               | 15        | 1      | 3         | 0      |                 |                               |                 |                               |
| 4                                | 11        | 8      | 5         | 1      | 33*             | 2*                            | 33*             | 2*                            |
| 5                                | 30        | 59     | 10        | 19     | 60              | 29                            | 60              | 29                            |
| <b>DCE</b>                       |           |        |           |        |                 |                               |                 |                               |
| 0                                | 9         | 2      | 1         | 0      | 11              | 0                             | 11              | 0                             |
| 1                                | 47        | 66     | 17        | 20     | 82              | 31                            | 82              | 31                            |

Note.—Low-risk cancer is defined as a Gleason score less than or equal to 3+4, clinically significant cancer is defined as a Gleason score greater than or equal to 4+3.

\* Data are for lesions with scores ≤ 4.

**Table E2. Distribution Scores in the In-House–Developed Scoring System by Reader**

| Sequence and Score | Reader 1 | Reader 2 | Reader 3 | Reader 4 | Reader 5 |
|--------------------|----------|----------|----------|----------|----------|
| T2 weighted, PZ    |          |          |          |          |          |

|                         |     |     |     |     |     |
|-------------------------|-----|-----|-----|-----|-----|
| 0                       | 5   | 4   | 0   | 2   | 7   |
| 1                       | 119 | 120 | 124 | 122 | 117 |
| T2 weighted, TZ         |     |     |     |     |     |
| 0                       | 2   | 2   | 0   | 0   | 0   |
| 1                       | 36  | 36  | 38  | 38  | 38  |
| DWI                     |     |     |     |     |     |
| 0                       | 7   | 9   | 10  | 7   | 12  |
| 1                       | 155 | 153 | 152 | 155 | 150 |
| DCE                     |     |     |     |     |     |
| 0                       | 23  | 13  | 10  | 29  | 20  |
| 1                       | 139 | 149 | 152 | 133 | 142 |
| Overall suspicion       |     |     |     |     |     |
| 1                       | 23  | 16  | 8   | 22  | 21  |
| 2                       | 104 | 113 | 112 | 106 | 96  |
| 3                       | 35  | 33  | 42  | 34  | 45  |
| Extracapsular extension |     |     |     |     |     |
| 0                       | 127 | 128 | 120 | 125 | 118 |
| 1                       | 35  | 34  | 42  | 37  | 44  |

Note.—Data are number of lesions.

**Table E3. Distribution of Each Score in the PI-RADS for Each Reader**

| Sequence and PI-RADS Score | Reader 1 | Reader 2 | Reader 3 | Reader 4 | Reader 5 |
|----------------------------|----------|----------|----------|----------|----------|
| T2-weighted, PZ            |          |          |          |          |          |
| 1                          | 2        | 0        | 0        | 1        | 2        |
| 2                          | 16       | 22       | 8        | 24       | 22       |
| 3                          | 35       | 23       | 33       | 24       | 29       |
| 4                          | 50       | 47       | 49       | 47       | 38       |
| 5                          | 21       | 32       | 34       | 28       | 33       |
| T2-weighted, TZ            |          |          |          |          |          |
| 1                          | 0        | 1        | 0        | 1        | 0        |

|           |     |     |     |     |     |
|-----------|-----|-----|-----|-----|-----|
| 2         | 2   | 4   | 1   | 5   | 0   |
| 3         | 8   | 10  | 13  | 10  | 13  |
| 4         | 17  | 14  | 17  | 14  | 14  |
| 5         | 11  | 9   | 7   | 8   | 11  |
| ADC       |     |     |     |     |     |
| 1         | 1   | 5   | 10  | 4   | 0   |
| 2         | 4   | 9   | 0   | 8   | 13  |
| 3         | 8   | 21  | 6   | 22  | 3   |
| 4         | 37  | 14  | 21  | 33  | 26  |
| 5         | 112 | 113 | 125 | 95  | 120 |
| 0         | 22  | 13  | 9   | 28  | 19  |
| 1         | 140 | 149 | 153 | 134 | 143 |
| Suspicion |     |     |     |     |     |
| 1         | 0   | 3   | 3   | 4   | 0   |
| 2         | 1   | 5   | 4   | 5   | 5   |
| 3         | 10  | 15  | 3   | 18  | 12  |
| 4         | 51  | 50  | 48  | 48  | 43  |
| 5         | 100 | 89  | 104 | 87  | 102 |

Note.—Data are number of lesions.

**Table E4. Pairwise Interreader  $\kappa$  Statistic of PI-RADS and the In-House–Developed Scoring System**

| Scoring System and Sequence | Reader Pairs |             |             |             |             |             |             |             |             |             | Mean $\kappa$ Score* |
|-----------------------------|--------------|-------------|-------------|-------------|-------------|-------------|-------------|-------------|-------------|-------------|----------------------|
|                             | 1 and 2      | 1 and 3     | 1 and 4     | 1 and 5     | 2 and 3     | 2 and 4     | 2 and 5     | 3 and 4     | 3 and 5     | 4 and 5     |                      |
| PI-RADS version 2           |              |             |             |             |             |             |             |             |             |             |                      |
| T2 weighted, PZ             | 0.47 (0.05)  | 0.50 (0.05) | 0.41 (0.06) | 0.41 (0.05) | 0.57 (0.05) | 0.49 (0.06) | 0.43 (0.06) | 0.49 (0.06) | 0.50 (0.06) | 0.45 (0.06) | 0.47                 |
| T2 weighted, TZ             | 0.33 (0.11)  | 0.41 (0.12) | 0.56 (0.11) | 0.46 (0.12) | 0.36 (0.11) | 0.21 (0.12) | 0.40 (0.11) | 0.40 (0.11) | 0.25 (0.12) | 0.34 (0.11) | 0.37                 |
| DWI                         | 0.40 (0.06)  | 0.46 (0.06) | 0.36 (0.06) | 0.48 (0.07) | 0.42 (0.06) | 0.41 (0.05) | 0.41 (0.05) | 0.34 (0.05) | 0.42 (0.06) | 0.39 (0.05) | 0.41                 |
| DCE                         | 0.52 (0.11)  | 0.54 (0.11) | 0.48 (0.09) | 0.47 (0.11) | 0.61 (0.14) | 0.26 (0.10) | 0.52 (0.11) | 0.38 (0.10) | 0.54 (0.12) | 0.43 (0.10) | 0.48                 |
| Overall suspicion           | 0.46 (0.05)  | 0.47 (0.06) | 0.42 (0.06) | 0.53 (0.06) | 0.48 (0.06) | 0.45 (0.05) | 0.47 (0.05) | 0.40 (0.05) | 0.48 (0.05) | 0.46 (0.06) | 0.46                 |
| In-house–developed system   |              |             |             |             |             |             |             |             |             |             |                      |

|                         |             |             |             |             |             |              |             |             |             |             |      |
|-------------------------|-------------|-------------|-------------|-------------|-------------|--------------|-------------|-------------|-------------|-------------|------|
| T2 weighted, PZ         | 0.19 (0.19) | 0.00 (0)    | 0.27 (0.23) | 0.48 (0.20) | 0.00 (0)    | -0.02 (0.01) | 0.34 (0.19) | 0.00 (0)    | 0.00 (0)    | 0.20 (0.18) | 0.15 |
| T2 weighted, TZ         | 0.47 (0.35) | 0.00 (0)    | 0.00 (0)    | 0.00 (0)    | 0.00 (0)    | 0.00 (0)     | 0.00 (0)    | NA          | NA          | NA          | 0.07 |
| DWI                     | 0.47 (0.16) | 0.44 (0.16) | 0.70 (0.16) | 0.39 (0.14) | 0.61 (0.14) | 0.74 (0.14)  | 0.64 (0.12) | 0.57 (0.15) | 0.61 (0.13) | 0.50 (0.14) | 0.57 |
| DCE                     | 0.50 (0.10) | 0.50 (0.11) | 0.31 (0.09) | 0.54 (0.09) | 0.58 (0.14) | 0.20 (0.08)  | 0.43 (0.12) | 0.24 (0.09) | 0.49 (0.12) | 0.31 (0.10) | 0.41 |
| Overall suspicion       | 0.61 (0.06) | 0.49 (0.07) | 0.51 (0.06) | 0.60 (0.06) | 0.66 (0.06) | 0.49 (0.07)  | 0.55 (0.06) | 0.57 (0.06) | 0.54 (0.06) | 0.49 (0.06) | 0.55 |
| Extracapsular extension | 0.76 (0.06) | 0.61 (0.07) | 0.68 (0.07) | 0.75 (0.06) | 0.73 (0.07) | 0.69 (0.07)  | 0.70 (0.07) | 0.68 (0.07) | 0.65 (0.07) | 0.69 (0.06) | 0.69 |

Note.—Data are interreader  $\kappa$  statistic, with standard error in parentheses. NA = applicable.

\* Mean  $\kappa$  score of all possible pairs of readers.
